# Supplementary material
Source: MDPI journal article supplement (https://www.mdpi.com/2673-4117/4/2/78)
Supplement: s1 [file s1]

**Table S1.** Lists the coefficients for the linear transformation between Standard 12-lead ECG and Frank XYZ VCG.

|                                        | I       | II      | III    | aVR    | aVL    | aVF    | V1      | V2      | V3      | V4      | V5      | V6     |
|----------------------------------------|---------|---------|--------|--------|--------|--------|---------|---------|---------|---------|---------|--------|
| <b>Kors' regression-related (1990)</b> |         |         |        |        |        |        |         |         |         |         |         |        |
| X                                      | 0.380   | -0.070  | 0.000  | 0.000  | 0.000  | 0.000  | -0.130  | 0.050   | -0.010  | 0.140   | 0.060   | 0.540  |
| Y                                      | -0.070  | 0.930   | 0.000  | 0.000  | 0.000  | 0.000  | 0.060   | -0.020  | -0.050  | 0.060   | -0.170  | 0.130  |
| Z                                      | 0.110   | -0.230  | 0.000  | 0.000  | 0.000  | 0.000  | -0.430  | -0.060  | -0.140  | -0.200  | -0.110  | 0.310  |
| <b>Kors' quasi-orthogonal (1990)</b>   |         |         |        |        |        |        |         |         |         |         |         |        |
| X                                      | 0.000   | 0.000   | 0.000  | 0.000  | 0.000  | 0.000  | 0.000   | 0.000   | 0.000   | 0.000   | 0.000   | 1.000  |
| Y                                      | 0.000   | 1.000   | 0.000  | 0.000  | 0.000  | 0.000  | 0.000   | 0.000   | 0.000   | 0.000   | 0.000   | 0.000  |
| Z                                      | 0.000   | 0.000   | 0.000  | 0.000  | 0.000  | 0.000  | 0.000   | -0.500  | 0.000   | 0.000   | 0.000   | 0.000  |
| <b>Bjerle quasi-orthogonal (1986)</b>  |         |         |        |        |        |        |         |         |         |         |         |        |
| X                                      | 0.000   | 0.000   | 0.000  | 0.000  | 0.000  | 0.000  | 0.000   | 0.000   | 0.000   | 0.000   | 0.000   | 1.060  |
| Y                                      | 0.000   | 0.000   | 0.000  | 0.000  | 0.000  | 1.880  | 0.000   | 0.000   | 0.000   | 0.000   | 0.000   | 0.000  |
| Z                                      | 0.000   | 0.000   | 0.000  | 0.000  | 0.000  | 0.000  | 0.000   | -0.523  | 0.000   | 0.000   | 0.000   | 0.043  |
| <b>Inverse Dower (1988)</b>            |         |         |        |        |        |        |         |         |         |         |         |        |
| X                                      | 0.632   | 0.235   | -0.397 | -0.434 | 0.515  | -0.081 | -0.515  | 0.044   | 0.882   | 1.212   | 1.125   | 0.831  |
| Y                                      | -0.235  | 1.066   | 1.301  | -0.415 | -0.768 | 1.184  | 0.157   | 0.164   | 0.098   | 0.127   | 0.127   | 0.076  |
| Z                                      | 0.059   | -0.132  | -0.191 | 0.037  | 0.125  | -0.162 | -0.917  | -0.139  | -1.277  | -0.601  | -0.086  | 0.230  |
| <b>Hyttinen (1995)</b>                 |         |         |        |        |        |        |         |         |         |         |         |        |
| X                                      | 0.000   | 1.155   | -0.560 | 0.000  | 0.000  | 0.000  | 0.305   | 0.299   | -0.052  | -0.038  | 2.412   | -4.275 |
| Y                                      | 0.682   | 0.000   | -0.563 | 0.000  | 0.000  | 0.000  | -0.130  | 0.053   | -0.001  | 0.072   | 1.004   | 0.217  |
| Z                                      | 0.857   | -1.295  | 0.000  | 0.000  | 0.000  | 0.000  | 0.410   | -0.019  | 0.010   | -0.086  | 0.238   | -0.034 |
| <b>Dawson post-MI (2009)</b>           |         |         |        |        |        |        |         |         |         |         |         |        |
| X                                      | 0.3147  | -0.1877 | 0.000  | 0.000  | 0.000  | 0.000  | -0.1031 | 0.0340  | -0.0001 | 0.0875  | 0.0816  | 0.6587 |
| Y                                      | -0.274  | 0.8959  | 0.000  | 0.000  | 0.000  | 0.000  | 0.0062  | -0.0233 | 0.027   | -0.0024 | -0.1002 | 0.1696 |
| Z                                      | 0.0817  | -0.2669 | 0.000  | 0.000  | 0.000  | 0.000  | -0.3386 | 0.0783  | -0.1659 | -0.152  | -0.2008 | 0.3614 |
| <b>Dawson Control (2009)</b>           |         |         |        |        |        |        |         |         |         |         |         |        |
| X                                      | 0.334   | -0.077  | 0.000  | 0.000  | 0.000  | 0.000  | -0.097  | 0.134   | -0.305  | 0.503   | -0.2824 | 0.795  |
| Y                                      | -0.289  | 0.810   | 0.000  | 0.000  | 0.000  | 0.000  | 0.0825  | -0.0562 | 0.049   | -0.0275 | -0.0308 | 0.143  |
| Z                                      | -0.0217 | -0.1466 | 0.000  | 0.000  | 0.000  | 0.000  | -0.459  | -0.0228 | -0.2089 | -0.0146 | -0.3007 | 0.2951 |
| <b>Guillem (2006)</b>                  |         |         |        |        |        |        |         |         |         |         |         |        |
| X                                      | 0.199   | -0.018  | 0.000  | 0.000  | 0.000  | 0.000  | -0.147  | -0.058  | 0.037   | 0.139   | 0.232   | 0.226  |
| Y                                      | -0.146  | 0.503   | 0.000  | 0.000  | 0.000  | 0.000  | 0.023   | -0.085  | -0.003  | 0.033   | 0.060   | 0.104  |
| Z                                      | 0.085   | -0.130  | 0.000  | 0.000  | 0.000  | 0.000  | -0.184  | -0.163  | -0.190  | -0.119  | -0.023  | 0.043  |

**Table S2.** Hyperparameter optimization variables, bounds, and sampling transformations.

| Hyperparameter Name    | Search Bound                                                             | Transformations Applied for Sampling |
|------------------------|--------------------------------------------------------------------------|--------------------------------------|
| Number of Hidden Units | [10, 50]                                                                 | Linear and Uniform                   |
| Minibatch              | [16, 32]                                                                 | Linear and Uniform                   |
| Learning Rate Schedule | 'none' or 'piecewise'<br>(reduced by a factor of 0.1<br>every 10 epochs) | Linear and Uniform                   |
| Learning rate          | $[1 \times 10^{-3}, 1 \times 10^{-1}]$                                   | Log-scaled and Uniform               |
| $\beta_1$              | [0.9, 0.999]                                                             | Log-scaled and Uniform               |
| $\beta_2$              | [0.9, 1]                                                                 | Log-scaled and Uniform               |
